# Supplementary material
Source: Research Square preprint supplement (doi:10.21203/rs.3.rs-9387281/v1)
Supplement: Supplementary file 1 [file 8ab8bb656f5455076a91e915.doc]

### Supporting Information

**Engineering a Root-Associated Bacterium *Pseudomonas stutzeri* A1501 with Nitrogen Fixation and Phosphate Solubilization Activities for Enhanced Growth of Host Rice**

**Author names:**

Changyan Yin1, Dongqi Wang2, Yaoyao Liu3, Yuhua Zhan1,4, Wei Lu1,4, Haichao Feng2, Yongliang Yan1,4, Xiubin Ke1,4, Min Lin1,2

**Affiliation(s):**

1Biotechnology Research Institute/Key Laboratory of Agricultural Microbiome (MARA), Chinese Academy of Agricultural Sciences, Beijing 100081, P. R.China

2Food Laboratory of Zhongyuan, College of Agriculture, Henan University, Kaifeng 475001, P. R. China

3Department of Agriculture and Food Science, Shijiazhuang University, Shijiazhuang, 050035, P. R.China

4National Center of Technology Innovation for Comprehensive Utilization of Saline-Alkali

Land, Dongying 257000, P. R. China

**Corresponding author：**Xiubin Ke and Min Lin

**E-mail address:** [kexiubin@caas.cn](mailto:kexiubin@caas.cn) (X. Ke) and [linmin@henu.edu.cn](mailto:linmin@henu.edu.cn) (M. Lin)

Table S1 Primers used for amplification of target genes in this study.

| Primer name | Sequence (5´to 3´) |  |
| --- | --- | --- |
| 10ACPF | ATTACGAATTCCCGGGGATCTGGTGTTGTTCCTGCTTTGG | Amplification *10ACP* |
| 10ACPR | ACGACGGCCAGTGCCAAGCTCAGGCTTTGGTTCAGATAGTGC |
| 10ALPF | ATTACGAATTCCCGGGGATCCGAGGTTGCGGTGGGATA | Amplification *10ALP* |
| 10ALPR | ACGACGGCCAGTGCCAAGCTAGTCGGCGGACGTATTGC |
| DCACPF | ATTACGAATTCCCGGGGATCCTGCCTGATTCGTAACAACCC | Amplification *DCACP* |
| DCACPR | ACGACGGCCAGTGCCAAGCTCGAAGTGCCGAAGAAGGTC |
| PAALP1F | ATTACGAATTCCCGGGGATCCAGGGTATGCCCGTAGGACTG | Amplification *PAALP1* |
| PAALP1R | ACGACGGCCAGTGCCAAGCTTCGCTGGATGCTGGAGGAG |
| PAALP2F | ATTACGAATTCCCGGGGATCGCAACCTGCCGACCCAGGCTAA | Amplification *PAALP2* |
| PAALP2R | ACGACGGCCAGTGCCAAGCTTTCATGGAGCGGAGCGAGGAGC |
| GLNapDF | ATTACGAATTCCCGGGGATCGAATACGGCCAGGAGTGAGATCATG | Amplification *GLNapD* |
| GLNapDR | ACGACGGCCAGTGCCAAGCTATCTGGACGCGCCCTATCC |
| GLNapEF | ATTACGAATTCCCGGGGATCATGTTCGCCATTCGTAATTCC | Amplification *GLNapE* |
| GLNapER | ACGACGGCCAGTGCCAAGCTCTAGTGGATCTGCTTCCAGTCC |
| MMNapAF | ATTACGAATTCCCGGGGATCCGTTAATATGAAACCGGAATGG | Amplification *MMNapA* |
| MMNapAR | ACGACGGCCAGTGCCAAGCTCTTCCCGGATAAACAAATCTGCG |
| MMphoCF | ATTACGAATTCCCGGGGATCGCCCTACACTGGCAGACA | Amplification *MMphoC* |
| MMphoCR | ACGACGGCCAGTGCCAAGCTATCGGGAAGACCGCTGGAT |

Table S2 Plasmids and corresponding complementary strains used in this study.

| Strains/Plasmids | Relevant characteristic | Reference or source |
| --- | --- | --- |
| Strains |  |  |
| A15PLA | A1501 imported an empty pLAFR3, Tcr | This study |
| A1510ACP | A1501 imported a recombination pLAFR3 containing 10ACP, Tcr | This study |
| A1510ALP | A1501 imported a recombination pLAFR3 containing 10ALP, Tcr | This study |
| A15DCACP | A1501 imported a recombination pLAFR3 containing DCACP, Tcr | This study |
| A15PAALP1 | A1501 imported a recombination pLAFR3 containing PAALP1, Tcr | This study |
| A15PAALP2 | A1501 imported a recombination pLAFR3 containing PAALP2, Tcr | This study |
| A15NapD | A1501 imported a recombination pLAFR3 containing GLNapD, Tcr | This study |
| A15NapE | A1501 imported a recombination pLAFR3 containing GLNapE, Tcr | This study |
| A15NapA | A1501 imported a recombination pLAFR3 containing MMNapA, Tcr | This study |
| A15PhoC | A1501 imported a recombination pLAFR3 containing MMPhoC, Tcr | This study |
| Plasmid |  |  |
| pRK2013 | Kmr; oriColE1 | Figurski et al. (1979) |
| pLAFR3 | Tcr; Tra–, Mob+, cos, RK2 replicon | Brian et al. (1987) |
| pLA*10ACP* | pLAFR3 carrying *10ACP, Tcr* | This study |
| pLA*10ALP* | pLAFR3 carrying *10ALP, Tcr* | This study |
| pLA*DCACP* | pLAFR3 carrying *DCACP, Tcr* | This study |
| pLA*PAALP1* | pLAFR3 carrying *PAALP1, Tcr* | This study |
| pLA*PAALP2* | pLAFR3 carrying *PAALP2, Tcr* | This study |
| pLA*NapD* | pLAFR3 carrying *GLNapD, Tcr* | This study |
| pLA*NapE* | pLAFR3 carrying *GLNapE, Tcr* | This study |
| pLA*NapA* | pLAFR3 carrying *MMNapA, Tcr* | This study |
| pLA*PhoC* | pLAFR3 carrying *MMPhoC, Tcr* | This study |

Table S3 Reverse transcription PCR primers used in this study

| Primer name | Sequence (5´ to 3´) | Amplified fragment |
| --- | --- | --- |
| *RT-10ACPF* | CGTTTGGCTATTACCCGCAA | 241 bp *10ACP* internal fragment |
| *RT-10ACPR* | GACTTGTCCAACGGCTTGAG |
| *RT-10ALPF* | CTTTATTCACAGCGGCGACA | 169 bp *10ALP* internal fragment |
| *RT-10ALPR* | GTTTTCGTCGAGCAGGTTGT |
| *RT-DCACPF* | CAGATGCAGATCAACGACGG | 202 bp *DCACP* internal fragment |
| *RT-DCACPR* | CAGTGGCCGAGATCAGGTAT |
| *RT-PAALP1F* | GATCCGTCACTGTTCAACCG | 223 bp *PAALP1* internal fragment |
| *RT-PAALP1R* | GCGCATCGATACCCTTGAAG |
| *RT-PAALP2F* | TTACCGACCTGAACCTGACC | 205 bp *PAALP2* internal fragment |
| *RT-PAALP2R* | GTGAAGATCGAGTTGGTGGC |
| *RT-NapDF* | CACGGAGGAATTCGAGAGGA | 154 bp *NapD* internal fragment |
| *RT-NapDR* | CCCCGAGACGATAAAGACCT |
| *RT-NapEF* | CGTCGAAAAGGTCACCAAGG | 216 bp *NapE* internal fragment |
| *RT-NapER* | AGCGCCTTCATGTCACTTTC |
| *RT-NapAF* | ATGCCAAAGTGTACATGCCG | 216 bp *NapA* internal fragment |
| *RT-NapAR* | AACTGTAGTCGTTCGGGGAG |
| *RT-phoCF* | CAGGATGCGATTCTGGAACG | 244 bp *PhoC* internal fragment |
| *RT-phoCR* | AACAGGGATTTCAGGGCAGA |
